# Supplementary material for: A 1,8-naphthalimide-based chemosensor for dual-mode sensing: colorimetric and fluorometric detection of multiple analytes
Source: Royal Society of Chemistry journal article supplement (doi:10.1039/c6ra20100h), 2016-01-01

## Supplementary Data

### A 1,8-naphthalimide-based chemosensor for dual-mode sensing: Colorimetric and fluorometric detection of multiple analytes

Yeo-Kyung La, Jong-Ah Hong, Yujin Jeong, and Jiyoun Lee \*

**Figure S1.** Time-course experiments of sensor **1** for the detection of  $F^-$  and  $CN^-$ . Absorbance at 628 nm were taken immediately after the addition of each anion.

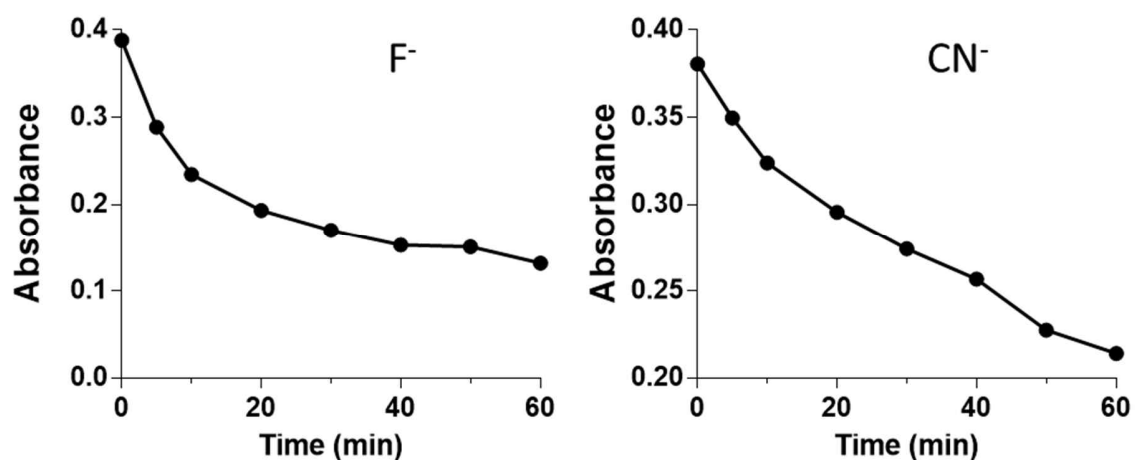

**Figure S2.** Benesi-Hildebrand plots for  $CN^-$  and  $F^-$  in the presence of **1** ( $5\mu M$ )

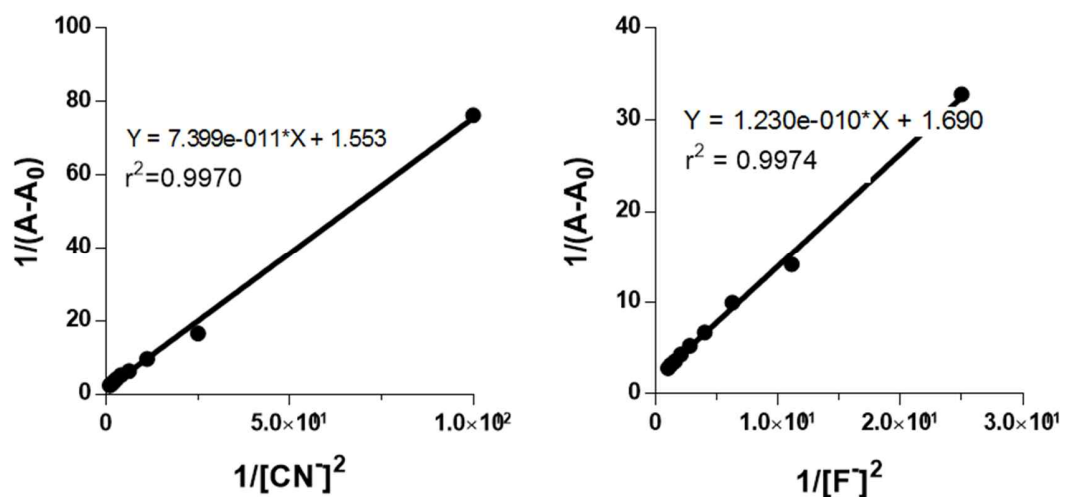

**Figure S3.** Absorption spectra of **1** ( $5\mu\text{M}$ ) in the presence of various ions ( $10\text{eq}$ ) in a 9:1 mixture of  $\text{CH}_3\text{CN}$  and HEPES buffer ( $10\text{mM}$ ,  $\text{pH } 7.4$ )

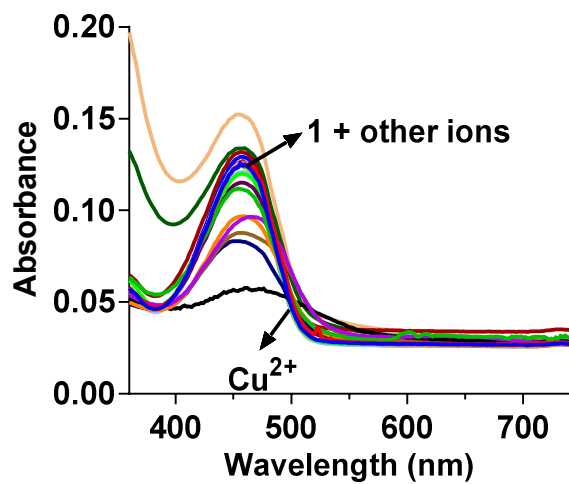

**Figure S4.** Time-dependent fluorescence responses of sensor **1** for  $\text{Hg}^{2+}$

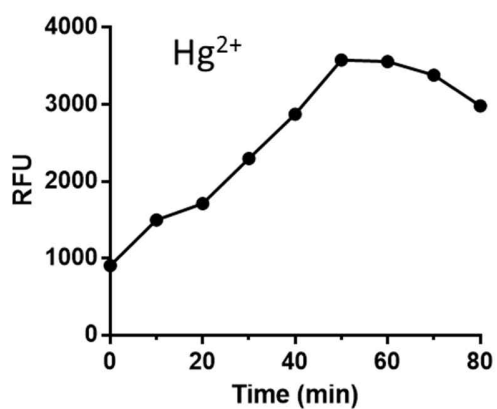

Supplement: c6ra20100h1.pdf [file c6ra20100h1.pdf]
